# Supplementary material
Source: HighWire-hosted journal article supplement (https://hw-f5-jim.highwire.org/content/jim-2022-002383)
Supplement: inline-supplementary-material-1 [file inline-supplementary-material-1.pdf]

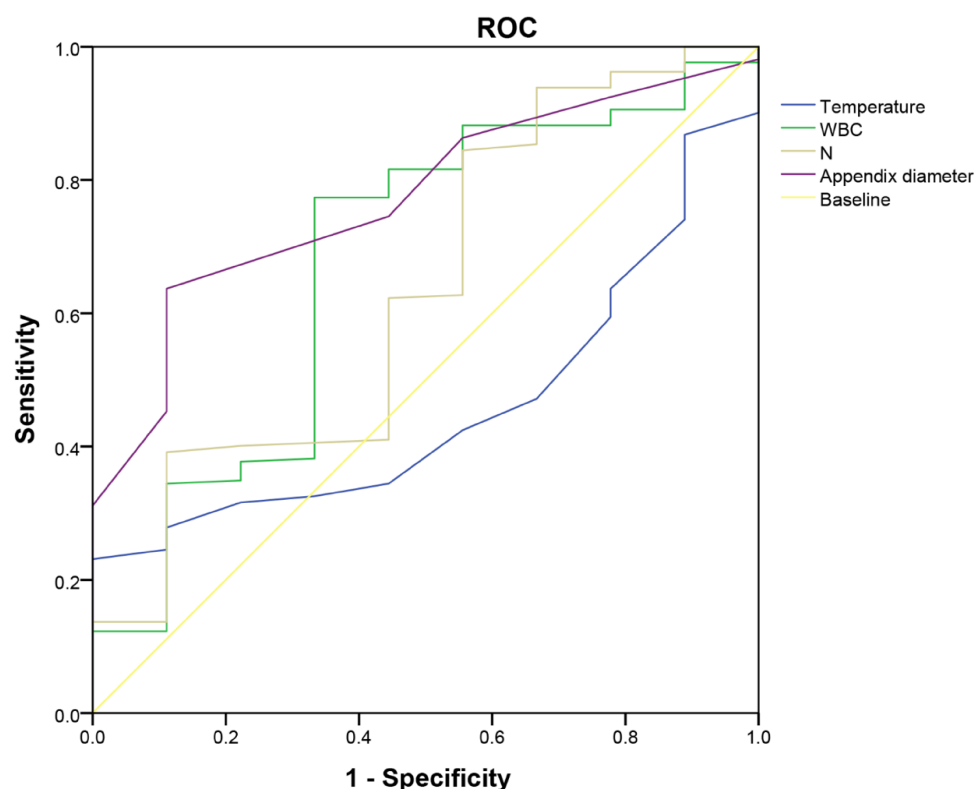

**Supplementary figure 1.** receiver operating characteristic (ROC) curves of body temperature, percentage of neutrophils (N%), appendix diameter and white blood cell (WBC) count in distinguishing simple appendicitis from non-simple (including suppurative and gangrenous) appendicitis
