# Supplementary material
Source: HighWire-hosted journal article supplement (https://hw-f5-jim.highwire.org/content/jim-2022-002383)
Supplement: inline-supplementary-material-2 [file inline-supplementary-material-2.pdf]

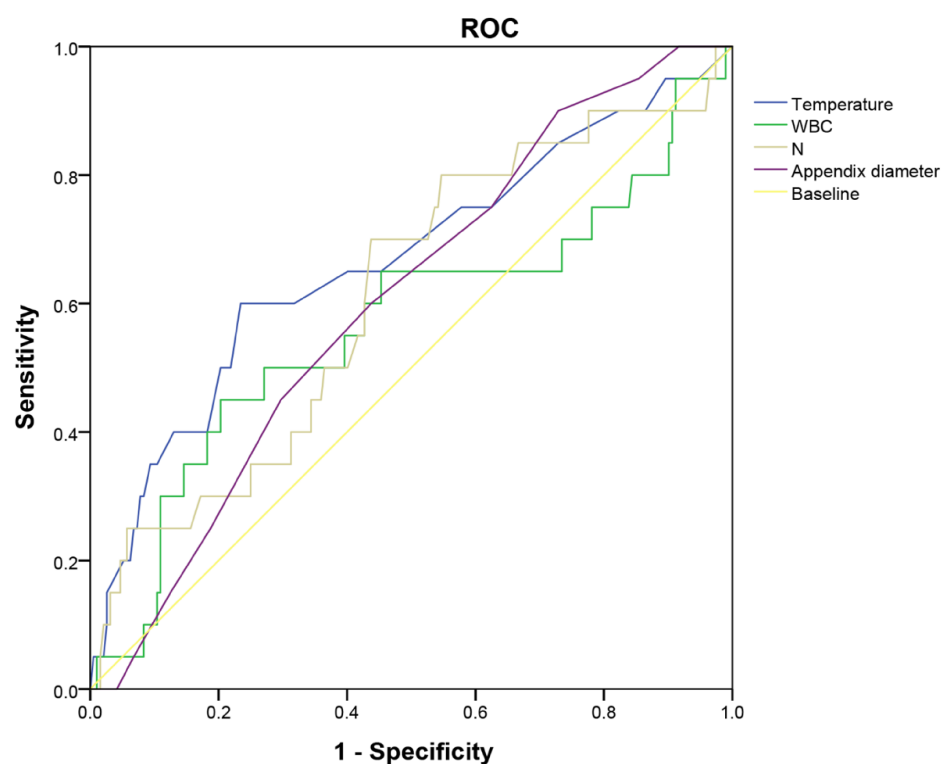

**Supplementary figure 2.** Receiver operating characteristic (ROC) curves of body temperature, N%, appendix diameter and WBC count in distinguishing suppurative appendicitis from gangrenous appendicitis
